# Supplementary material for: New Insights Into Culturable and Unculturable Bacteria Across the Life History of Medicinal Maggots Lucilia sericata (Meigen) (Diptera: Calliphoridae)
Source: PubMed Central journal article supplement (PMC7156559; doi:10.3389/fmicb.2020.00505), 2020-04-08
Supplement: Data_Sheet_1.pdf [file Data_Sheet_1.pdf]

## Supplementary materials

**TABLE S1:** Characteristics of the representative *16S rRNA* gene sequences of 21 bacterial species identified from *Lucilia sericata* using Culture-dependent method

| Assigned bacterial spp.                 | Origin                         | Length (bp) | Similarity % |            |        | Taxonomy       |                    | GenBank ID |
|-----------------------------------------|--------------------------------|-------------|--------------|------------|--------|----------------|--------------------|------------|
|                                         |                                |             | NCBI         | EzBioCloud | leBIBI | Phylum         | Family             |            |
| <i>Bacillus cereus</i>                  | L3 retrieved from a bed sore   | 1369        | 99.86        | 99.86      | 99     | Firmicutes     | Bacillaceae        | MF399393   |
| <i>Wohlfahrtiimonas chitiniclastica</i> | L3 retrieved from a bed sore   | 1399        | 99.14        | 99.57      | 99     | Proteobacteria | unclassified       | MF399392   |
| <i>Paenibacillus urinalis</i>           | Crop of unfed L3               | 1444        | 99.04        | 99.12      | 99     | Firmicutes     | Paenibacillaceae   | MF399389   |
| <i>Lactococcus garvieae</i>             | Sterile L1                     | 1411        | 99.93        | 99.93      | 99     | Firmicutes     | Streptococcaceae   | MF399387   |
| <i>Morganella morganii</i>              | L3 retrieved from a bed sore   | 1408        | 99.14        | 99.19      | 99     | Proteobacteria | Morganellaceae     | MF399386   |
| <i>Pseudomonas alcaligenes</i>          | Salivary glands of unfed L3    | 330         | 100          | 100        | 99     | Proteobacteria | Pseudomonadaceae   | MF399385   |
| <i>Pseudomonas japonica</i>             | Sugar meal                     | 1404        | 98.99        | 99.13      | 99     | Proteobacteria | Pseudomonadaceae   | MF399384   |
| <i>Proteus mirabilis</i>                | Crop of unfed L3               | 1410        | 100          | 99.93      | 99     | Proteobacteria | Morganellaceae     | MF399382   |
| <i>Proteus vulgaris</i>                 | Sterile eggs                   | 1410        | 99.78        | 99.71      | 99     | Proteobacteria | Morganellaceae     | MF399333   |
| <i>Citrobacter freundii</i>             | Sterile eggs                   | 1413        | 100          | 100        | 100    | Proteobacteria | Enterobacteriaceae | MF399329   |
| <i>Providencia alcalifaciens</i>        | Non sterile eggs               | 1428        | 99.86        | 99.86      | 99     | Proteobacteria | Morganellaceae     | MF399328   |
| <i>Providencia rustigianii</i>          | Sterile L1                     | 1429        | 100          | 99.93      | 99     | Proteobacteria | Morganellaceae     | MF399323   |
| <i>Providencia vermicola</i>            | Male fly from field            | 1410        | 99.78        | 99.78      | 99     | Proteobacteria | Morganellaceae     | MF399322   |
| <i>Klebsiella oxytoca</i>               | Female fly                     | 1405        | 99.93        | 100        | 99     | Proteobacteria | Enterobacteriaceae | MF399315   |
| <i>Enterococcus avium</i>               | L3 retrieved from a bed sore   | 1426        | 100          | 99.93      | 99     | Firmicutes     | Enterococcaceae    | MF399312   |
| <i>Enterococcus faecalis</i>            | Sterile L1                     | 1414        | 100          | 99.93      | 99     | Firmicutes     | Enterococcaceae    | MF399311   |
| <i>Escherichia coli</i>                 | L3 retrieved from a bed sore   | 1409        | 99.71        | 99.71      | 99     | Proteobacteria | Enterobacteriaceae | MF399292   |
| <i>Serratia marcescens</i>              | Malpighian tubules of unfed L3 | 1423        | 100          | 99.64      | 99     | Proteobacteria | Yersiniaceae       | MF399279   |
| <i>Shigella sonnei</i>                  | Sterile L1                     | 1447        | 100          | 99.21      | 99     | Proteobacteria | Enterobacteriaceae | MF399270   |
| <i>Staphylococcus hominis</i>           | non sterile pupae              | 1409        | 99.71        | 99.86      | 99     | Firmicutes     | Staphylococcaceae  | MF399394   |
| <i>Myroides phaeus</i>                  | Crop of fed L3                 | 1393        | 97.95        | 97.96      | 98     | Bacteroidetes  | Flavobacteriaceae  | MF399388   |

**TABLE S2:** Characteristics of the representative *16S rRNA* gene sequences of 32 bacterial species identified from *Lucilia sericata* using Culture-independent method

| Assigned bacterial spp.                  | Origin                   | Length (bp) | Similarity % |            |        | Taxonomy       |                      | GenBank ID |
|------------------------------------------|--------------------------|-------------|--------------|------------|--------|----------------|----------------------|------------|
|                                          |                          |             | NCBI         | EzBioCloud | leBIBI | Phylum         | Family               |            |
| <i>Serratia marcescens</i>               | Malpighian tubules of L3 | 768         | 99.35        | 99.35      | 99     | Proteobacteria | Yersiniaceae         | MF327132   |
| <i>Pseudoxanthomonas japonensis</i>      | L2                       | 768         | 99.61        | 99.22      | 99     | Proteobacteria | Xanthomonadaceae     | MF327131   |
| <i>Ventosimonas sp.</i>                  | Female fly               | 744         | 92           | 92         | 92     | Proteobacteria | Ventosimonadaceae    | MF327125   |
| <i>Pseudomonas sp5</i>                   | Female fly               | 764         | 90           | 90.90      | 91     | Proteobacteria | Pseudomonadaceae     | MF327119   |
| <i>Pseudomonas sp4</i>                   | Malpighian tubules of L3 | 521         | 99           | 99.42      | 99     | Proteobacteria | Pseudomonadaceae     | MF327114   |
| <i>Pseudomonas sp3</i>                   | L2                       | 571         | 100          | 97.72      | 97     | Proteobacteria | Pseudomonadaceae     | MF327113   |
| <i>Pseudomonas sp2.</i>                  | Foregut of L3            | 762         | 99.87        | 99.87      | 99     | Proteobacteria | Pseudomonadaceae     | MF327112   |
| <i>Pseudomonas otitidis</i>              | Foregut of L3            | 762         | 99.87        | 99.87      | 99     | Proteobacteria | Pseudomonadaceae     | MF327108   |
| <i>Pseudacidovorax intermedius</i>       | Male fly                 | 762         | 99.21        | 99.47      | 99     | Proteobacteria | Comamonadaceae       | MF327105   |
| <i>Providencia vermicola</i>             | L2                       | 766         | 99.61        | 99.61      | 99     | Proteobacteria | Morganellaceae       | MF327103   |
| <i>Providencia rustigianii</i>           | L2                       | 568         | 98.56        | 98.43      | 98     | Proteobacteria | Morganellaceae       | MF327079   |
| <i>Providencia rettgeri</i>              | Hindgut of L3            | 1499        | 99.61        | 99.61      | 99     | Proteobacteria | Morganellaceae       | MF327077   |
| <i>Providencia burhodogranariae</i>      | Digestive tract of L2    | 766         | 99.09        | 99.22      | 99     | Proteobacteria | Morganellaceae       | MF327075   |
| <i>Proteus vulgaris</i>                  | Foregut of L3            | 768         | 98.57        | 98.57      | 99     | Proteobacteria | Morganellaceae       | MF327073   |
| <i>Proteus mirabilis</i>                 | Malpighian tubules of L3 | 768         | 99.61        | 99.74      | 99     | Proteobacteria | Morganellaceae       | MF327052   |
| <i>Proteus.hauseri</i>                   | Pupae                    | 1493        | 99.61        | 99.61      | 99     | Proteobacteria | Morganellaceae       | MF327040   |
| <i>Klebsiella michiganensis</i>          | Foregut of L3            | 766         | 98.43        | 98.69      | 98     | Proteobacteria | Enterobacteriaceae   | MF327039   |
| <i>Morganella morganii</i>               | L2                       | 768         | 98.05        | 98.63      | 98     | Proteobacteria | Morganellaceae       | MF327037   |
| <i>Citrobacter freundii</i>              | Eggs                     | 759         | 98.70        | 98.83      | 99     | Proteobacteria | Enterobacteriaceae   | MF327034   |
| <i>Acinetobacter rudis</i>               | Male fly                 | 766         | 95.69        | 95.42      | 96     | Proteobacteria | Moraxellaceae        | MF327033   |
| <i>Weissella koreensis</i>               | Eggs                     | 798         | 99.25        | 99         | 99     | Firmicutes     | Leuconostocaceae     | MF327032   |
| <i>Vagococcus fluvialis</i>              | Malpighian tubules of L3 | 784         | 97.56        | 97.32      | 98     | Firmicutes     | Enterococcaceae      | MF327031   |
| <i>Lysinibacillus parviboronicapiens</i> | Eggs                     | 772         | 92.81        | 92.35      | 92     | Firmicutes     | Bacillaceae          | MF327027   |
| <i>Lactococcus garvieae</i>              | Salivary glands of L3    | 1507        | 99.74        | 99.87      | 99     | Firmicutes     | Streptococcaceae     | MF327026   |
| <i>Lactobacillus sakei</i>               | L2                       | 793         | 100          | 99.87      | 100    | Firmicutes     | Lactobacillaceae     | MF327025   |
| <i>Lactobacillus curvatus</i>            | L1                       | 796         | 99.50        | 99.62      | 99     | Firmicutes     | Lactobacillaceae     | MF327023   |
| <i>Clostridium perfringens</i>           | Eggs                     | 743         | 99.46        | 99.46      | 99     | Firmicutes     | Clostridiaceae       | MF327021   |
| <i>Bacillus safensis</i>                 | Male fly                 | 774         | 99.61        | 99.61      | 99     | Firmicutes     | Bacillaceae          | MF327020   |
| <i>Myroides phaeus</i>                   | L2                       | 758         | 99.21        | 99.34      | 99     | Bacteroidetes  | Flavobacteriaceae    | MF327019   |
| <i>Dysgonomonas sp.</i>                  | Female fly               | 755         | 93           | 92.56      | 93     | Bacteroidetes  | Dysgonamonadaceae    | MF327013   |
| <i>Propionibacterium acnes</i>           | Male fly                 | 746         | 99.60        | 99.20      | 99     | Actinobacteria | Propionibacteriaceae | MF327011   |
| <i>Chryseobacterium lactis</i>           | Malpighian tubules of L3 | 756         | 98.68        | 99.47      | 99     | Bacteroidetes  | Flavobacteriaceae    | MF327012   |
